# Supplementary material
Source: publisher figshare collection journal article supplement (https://acs.figshare.com/ndownloader/files/4344115)
Supplement: Supplementary file 1 [file 4344115]

# Supporting Information

## Effects of Layer Stacking on the Combination Raman Modes in Graphene

*Rahul Rao,<sup>1\*</sup> Ramakrishna Podila,<sup>2</sup> Ryuichi Tsuchikawa,<sup>3</sup> Jyoti Katoch,<sup>3</sup> Derek Tishler,<sup>3</sup>  
Apparao M. Rao,<sup>2</sup> Masa Ishigami<sup>3</sup>*

<sup>1</sup>Materials and Manufacturing Directorate, Air Force Research Laboratory, WPAFB,  
45433

<sup>2</sup>Department of Physics and Astronomy, Clemson University, Clemson, SC, 29634

<sup>3</sup>Department of Physics and Nanoscience Technology Center, University of Central  
Florida, Orlando, FL, 32816

Email: rahul.rao@wpafb.af.mil

---

\* To whom correspondence should be addressed

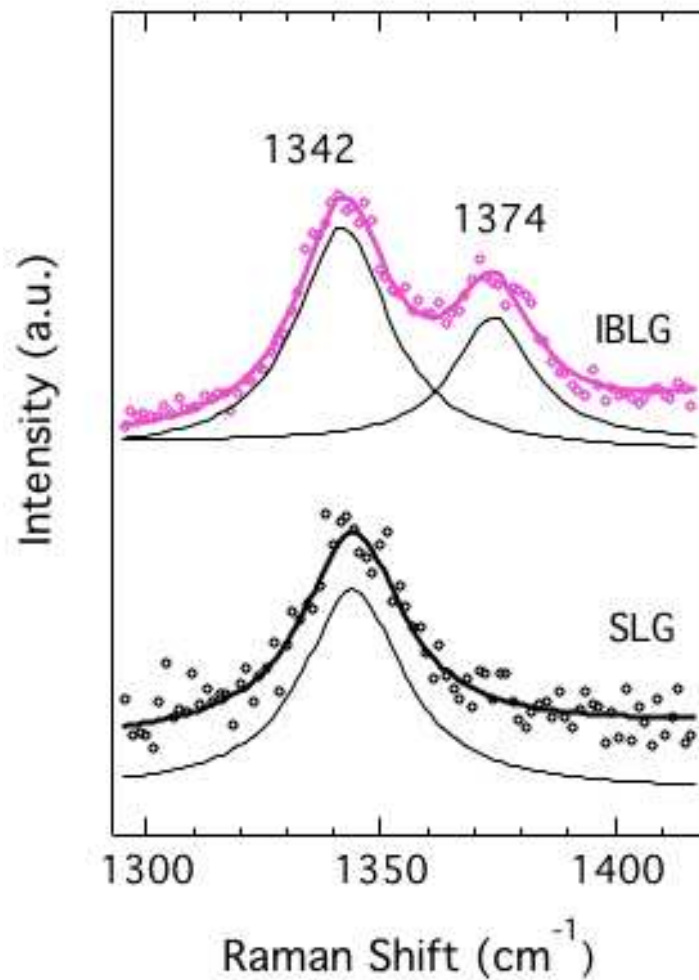

Figure S1.  
spectra in the  
region from  
SLG. The  
normalized by  
of the G band.

Raman  
D band  
IBLG and  
spectra were  
the intensity

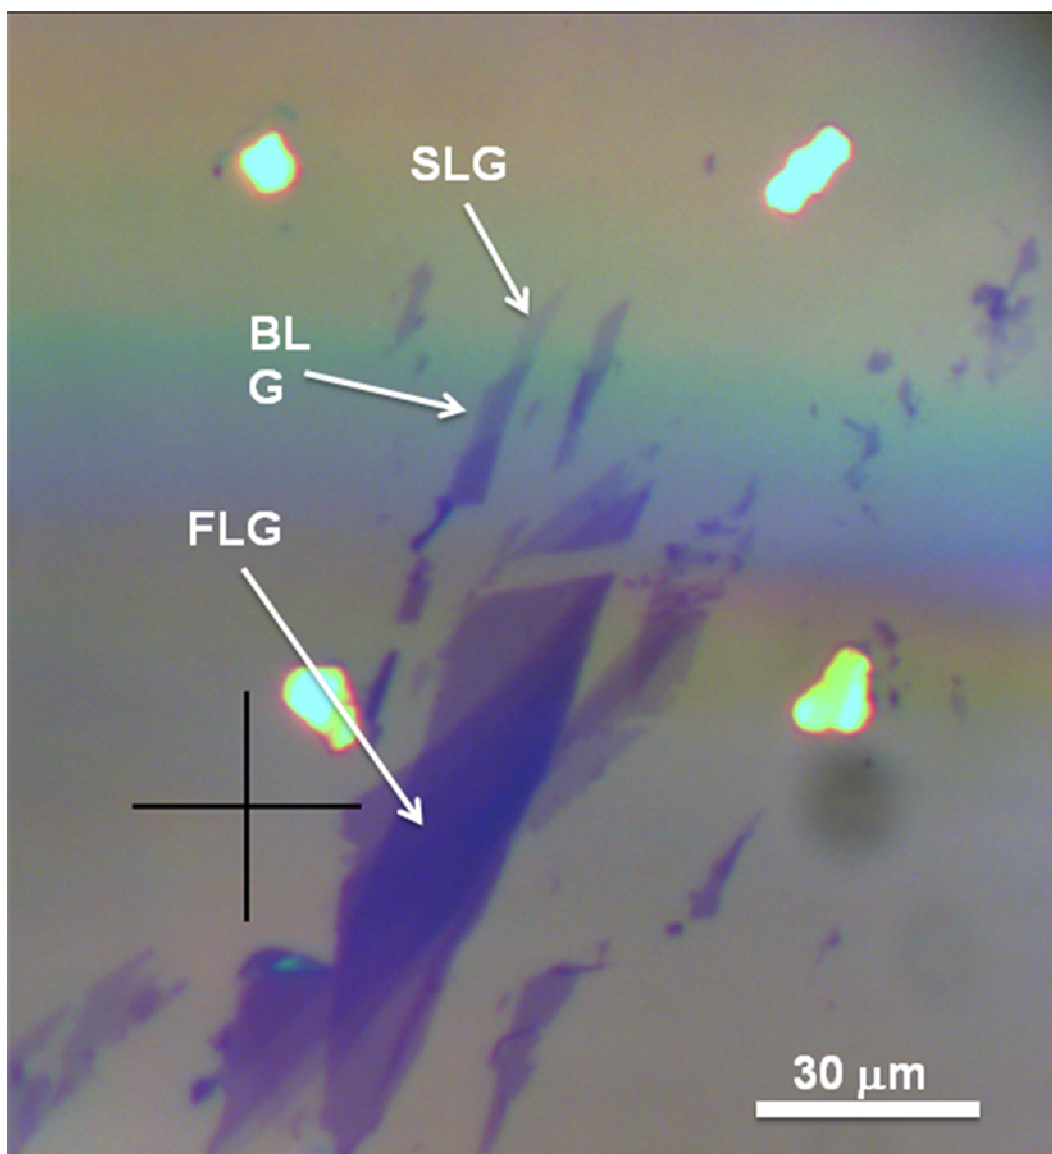

Figure S2 – Optical microscope (50 x magnification) image of graphene flakes having 1, 2, and few layer graphene on 280 nm SiO<sub>2</sub>/Si substrate.

Figure S3 –  
microscope

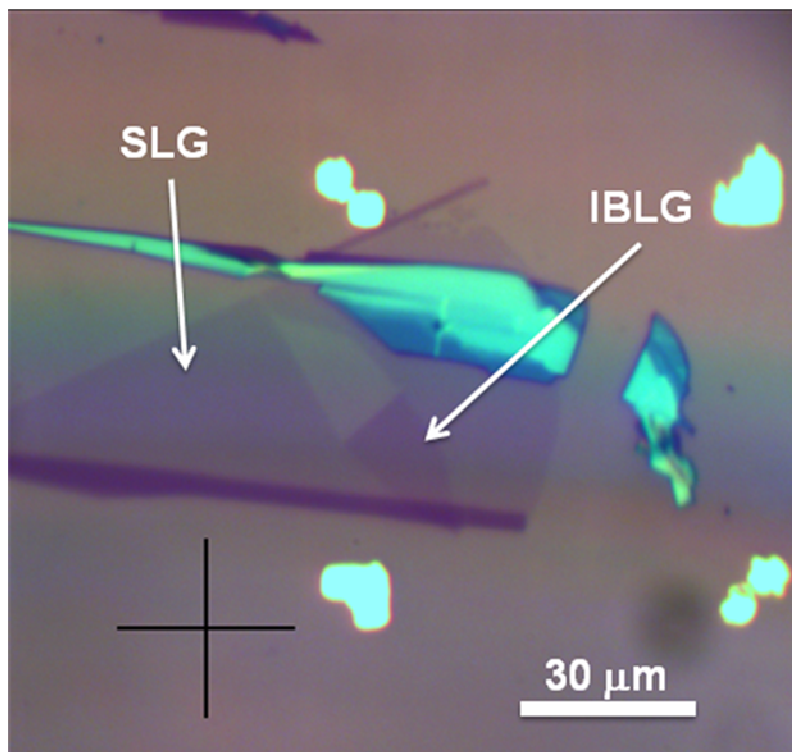

Optical  
(50 x

magnification) image of a single layer graphene flake, a part of which has folded upon itself to form incommensurate bilayer graphene.
